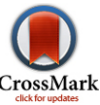

## Correction

# Correction: Macrophage Control of Phagocytosed Mycobacteria Is Increased by Factors Secreted by Alveolar Epithelial Cells through Nitric Oxide Independent Mechanisms

The *PLOS ONE* Staff

## Notice of Republication

This article was republished on August 25, 2014, to correct Figure 4, which was erroneously resized during the typesetting process. The publisher apologizes for the errors. Please view this article again to download the correct version. The originally published, uncorrected article and the republished, corrected article are provided here for reference.

## Supporting Information

**File S1.** Originally published, uncorrected article.  
(PDF)

**File S2.** Republished, corrected article.  
(PDF)

## Reference

1. Petursdottir DH, Chuquimia OD, Freidl R, Fernández C (2014) Macrophage Control of Phagocytosed Mycobacteria Is Increased by Factors Secreted by Alveolar Epithelial Cells through Nitric Oxide Independent Mechanisms. *PLoS ONE* 9(8): e103411. doi:10.1371/journal.pone.0103411

**Citation:** The *PLOS ONE* Staff (2014) Correction: Macrophage Control of Phagocytosed Mycobacteria Is Increased by Factors Secreted by Alveolar Epithelial Cells through Nitric Oxide Independent Mechanisms. *PLoS ONE* 9(9): e108198. doi:10.1371/journal.pone.0108198

**Published:** September 9, 2014

**Copyright:** © 2014 The *PLOS ONE* Staff. This is an open-access article distributed under the terms of the Creative Commons Attribution License, which permits unrestricted use, distribution, and reproduction in any medium, provided the original author and source are credited.
